# Supplementary material for: Antimicrobial Evaluation of Anthraquinones and Preanthraquinone from the Root Extract of Aloe kefaensis
Source: Hindawi journal article supplement (doi:10.1155/2024/6629545), 2024-01-08
Supplement: f1 [file 6629545.f1.docx]

Supporting Information

1. Antimicrobial activity test of Crude Extract’s Zone of Growth Inhibition

Key:;AK:*Aloe kefaensis****;*** PE: Petroleum ether; DCM:Dichloromethane; AC:Acetone , MeOH:Methanol; Genta: Gentamicin;Clo: Clotrimazole; D:DMSO


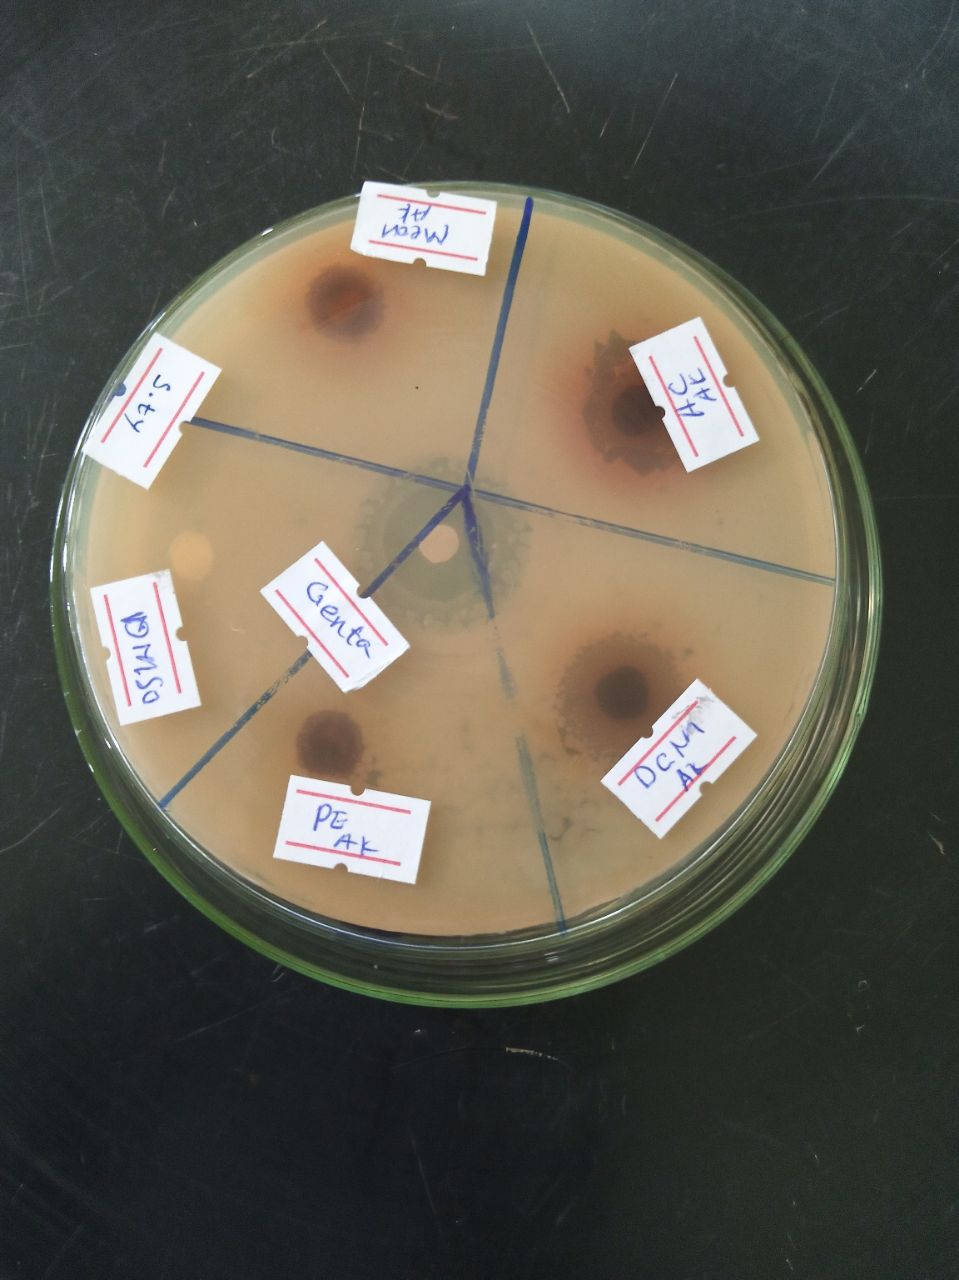

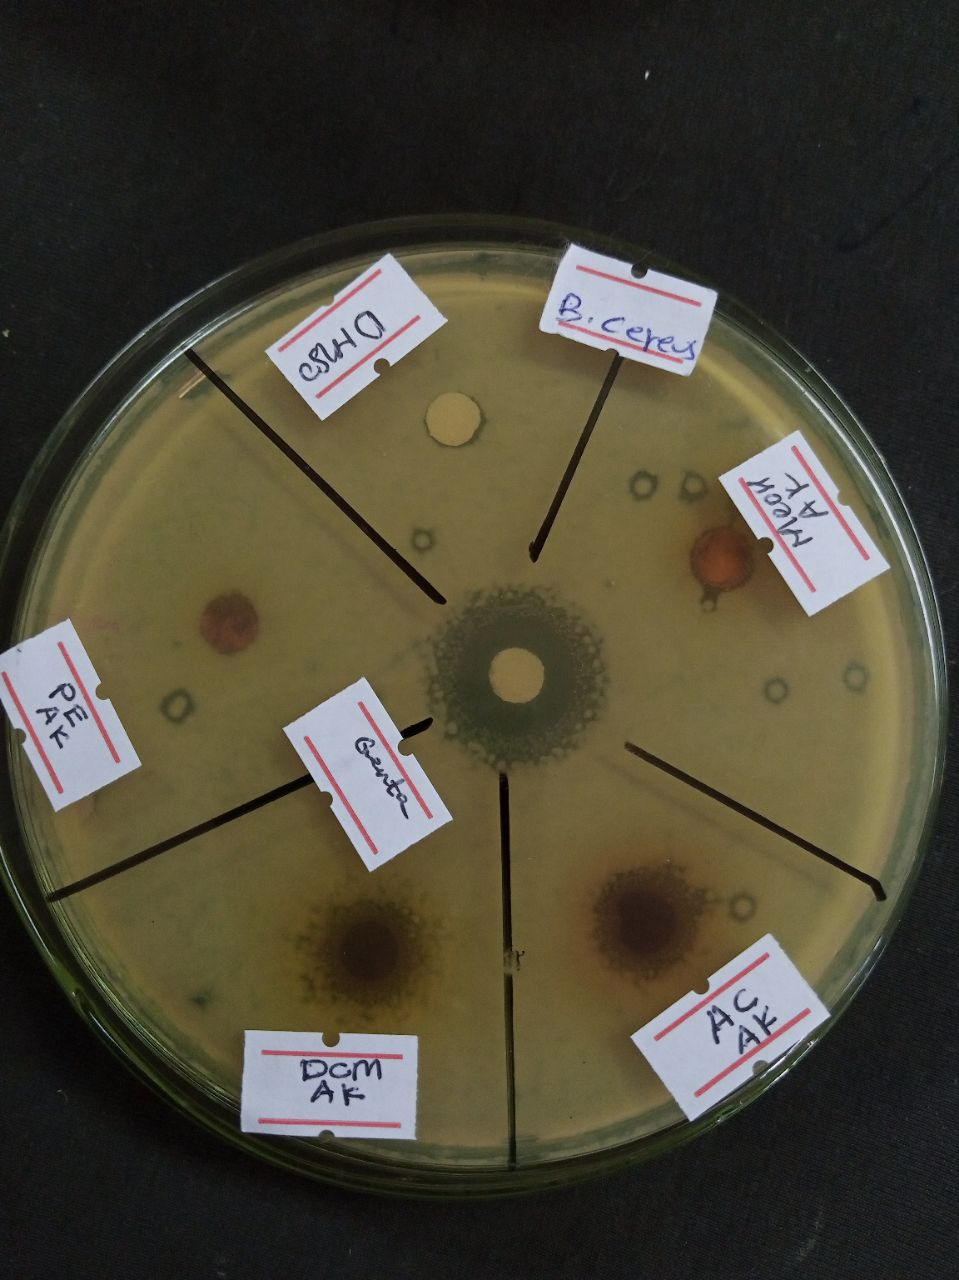

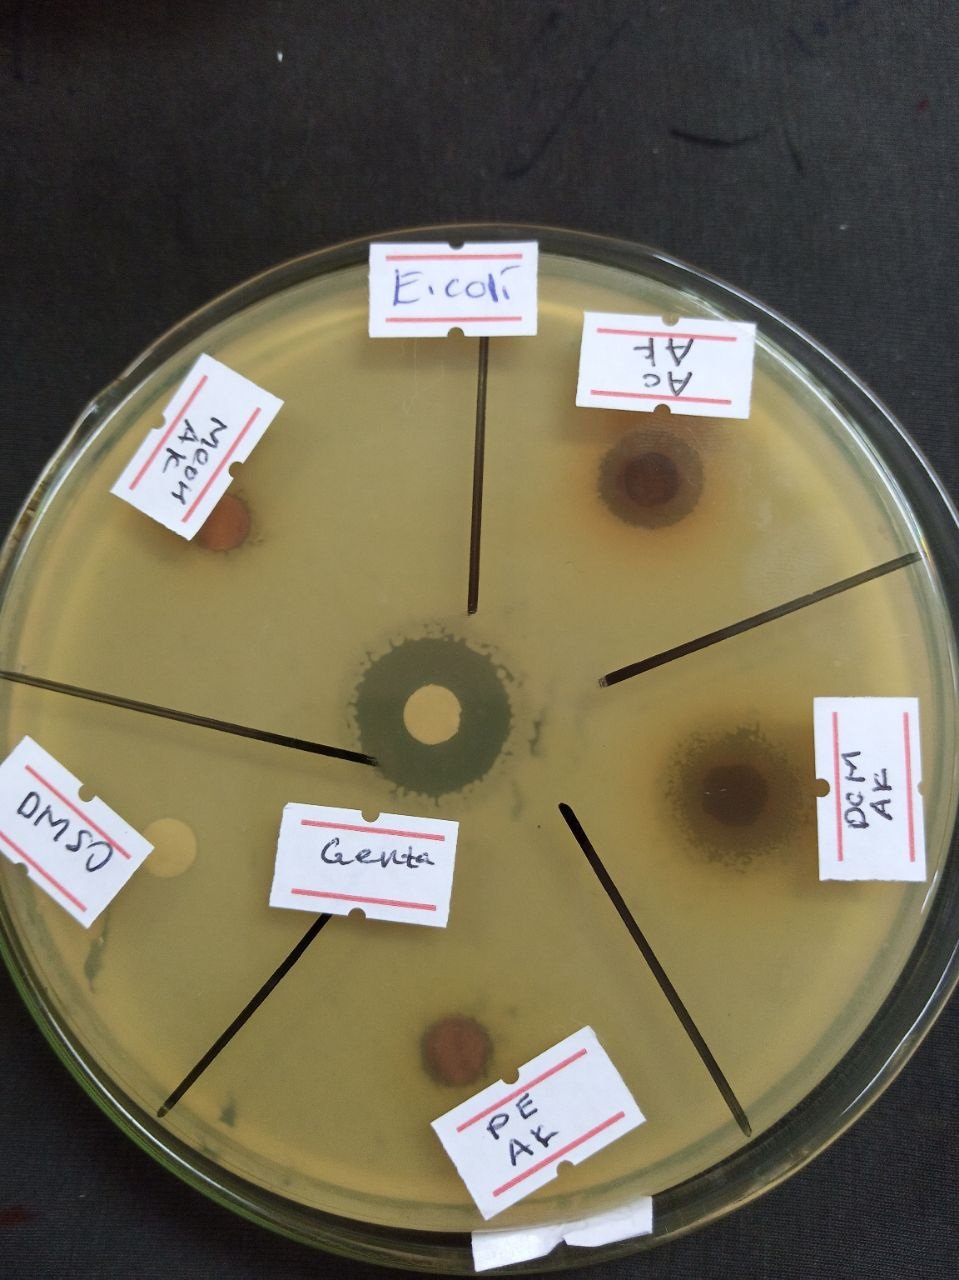


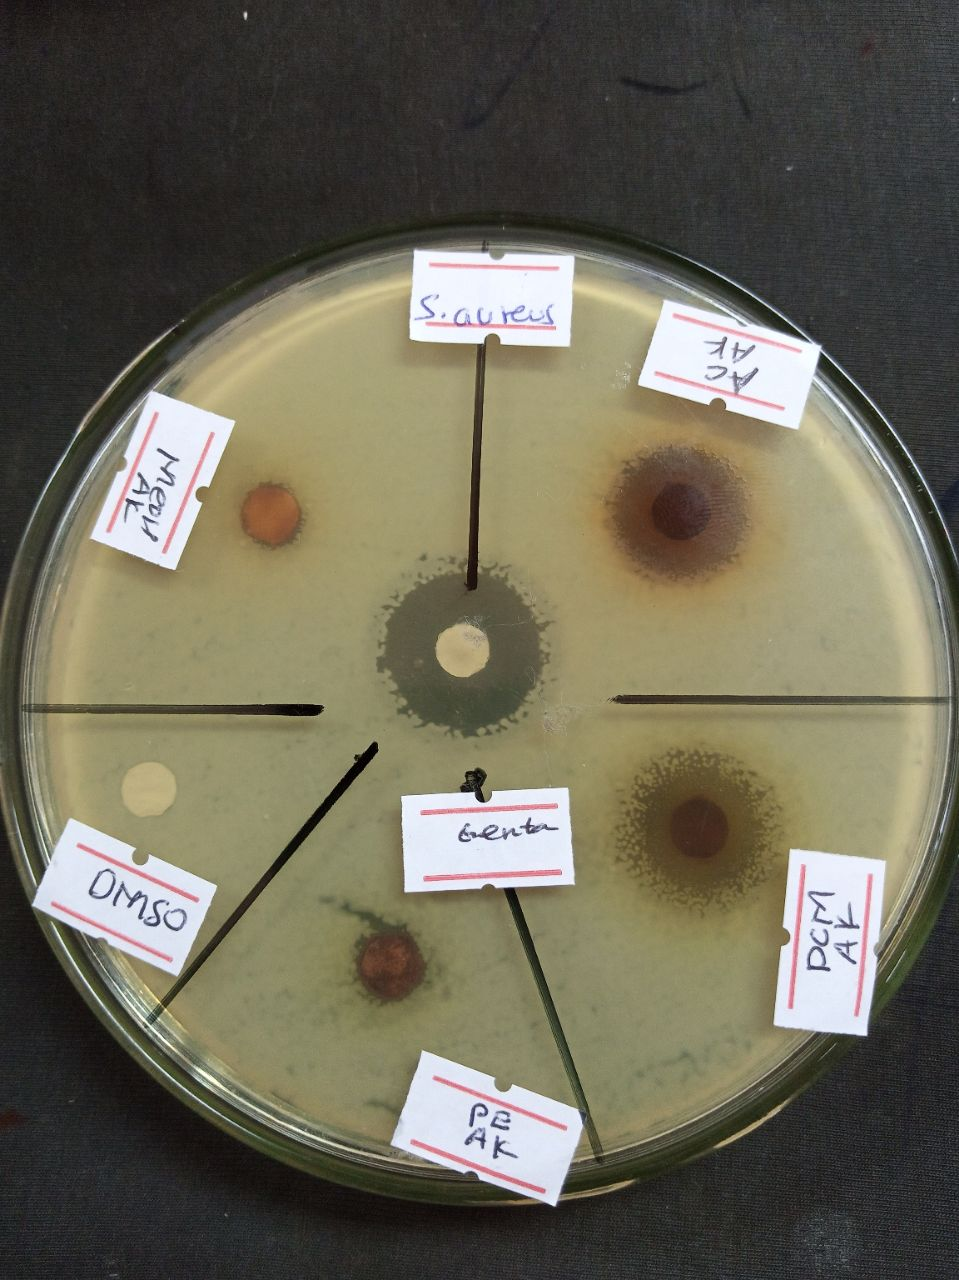

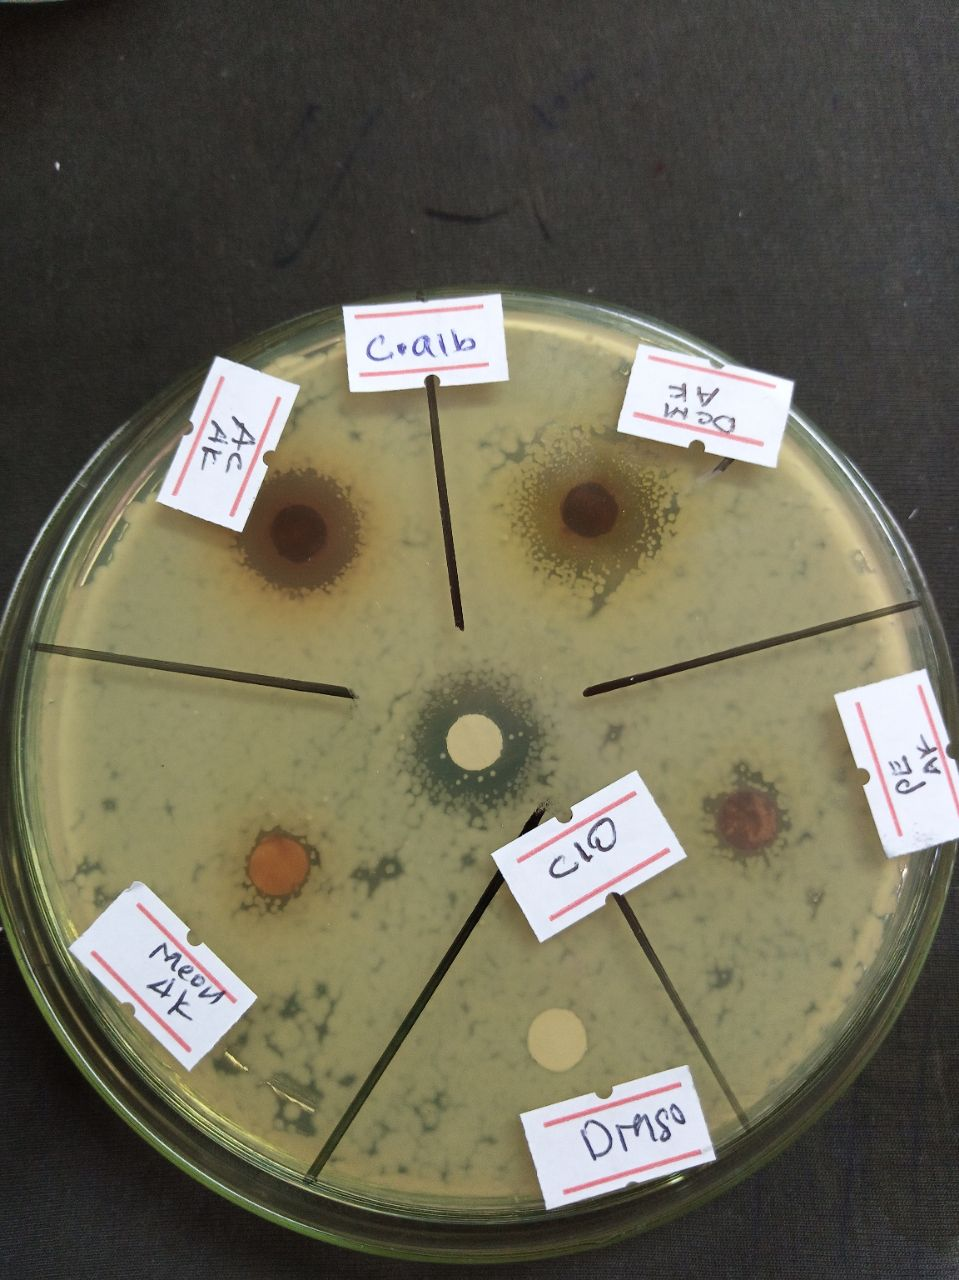


2. Antimicrobial activities of different concentrations of dichloromethane (DCM) extracts

Key: DCM1, DCM2, DCM3, DCM4: Dichloromethane extract at 100, 50, 25, 12.5 mg/l concentration
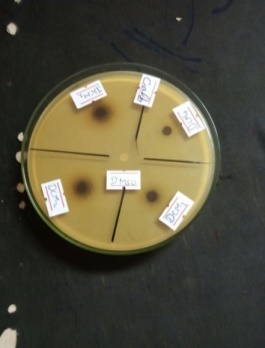

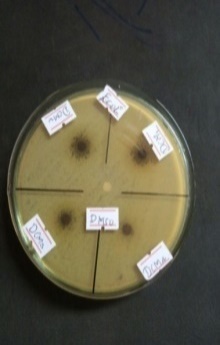

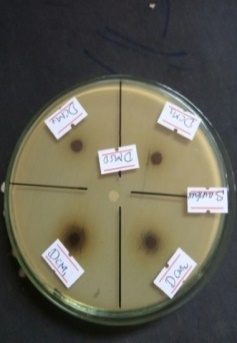

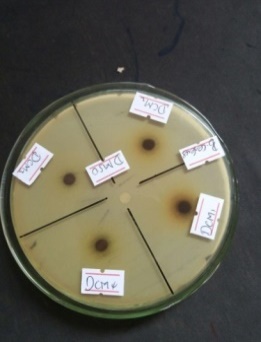

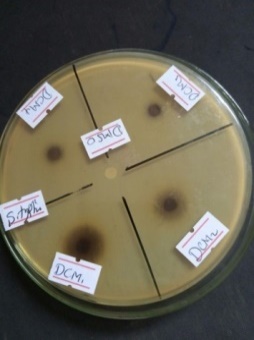


3. TLC of isolated compounds


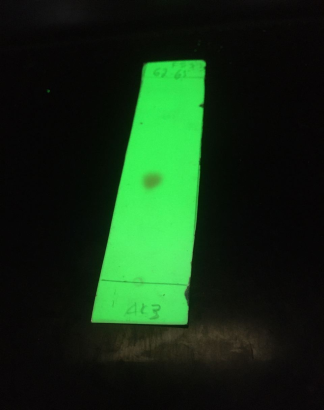

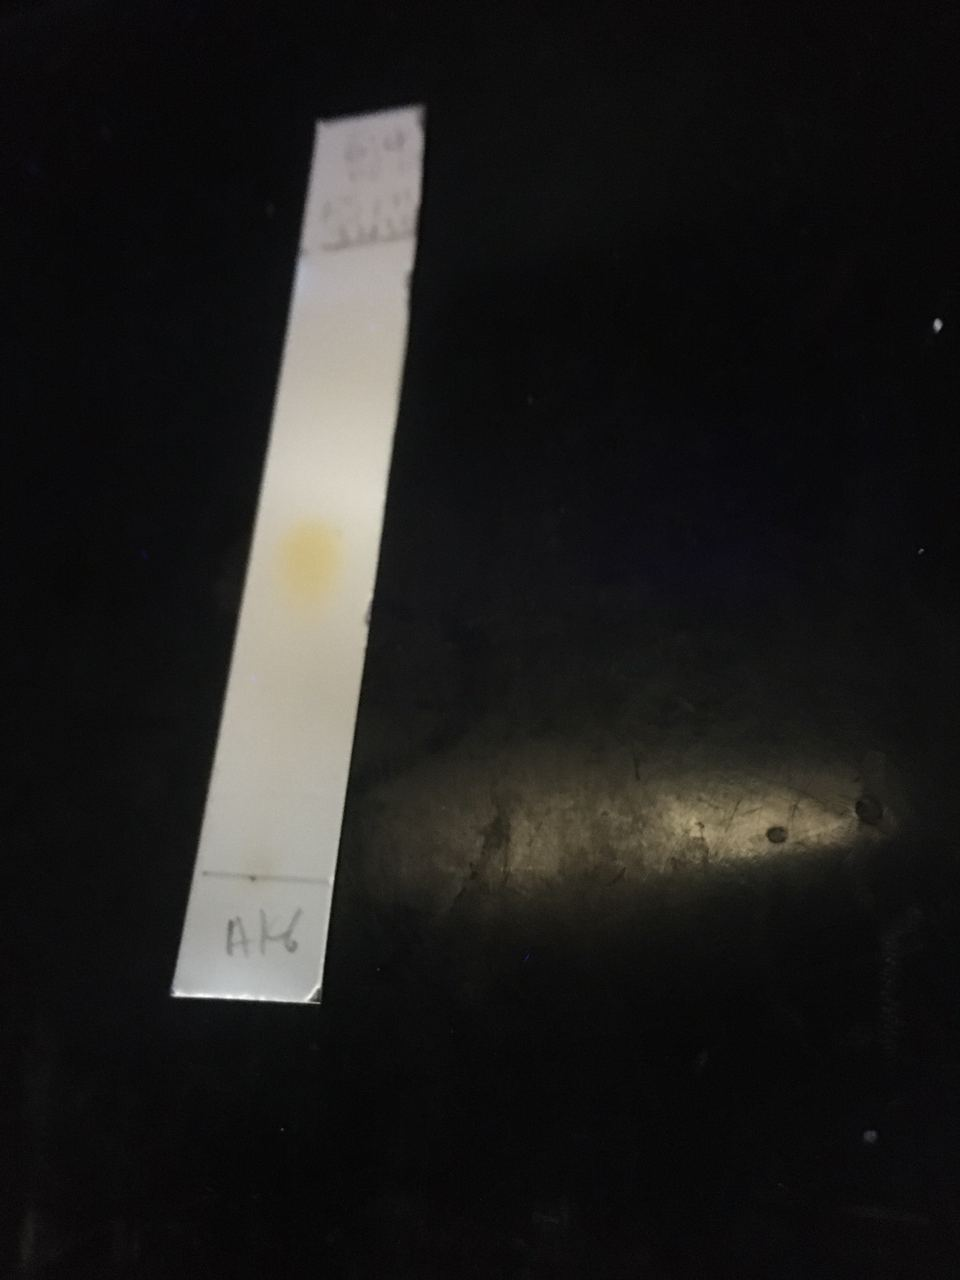

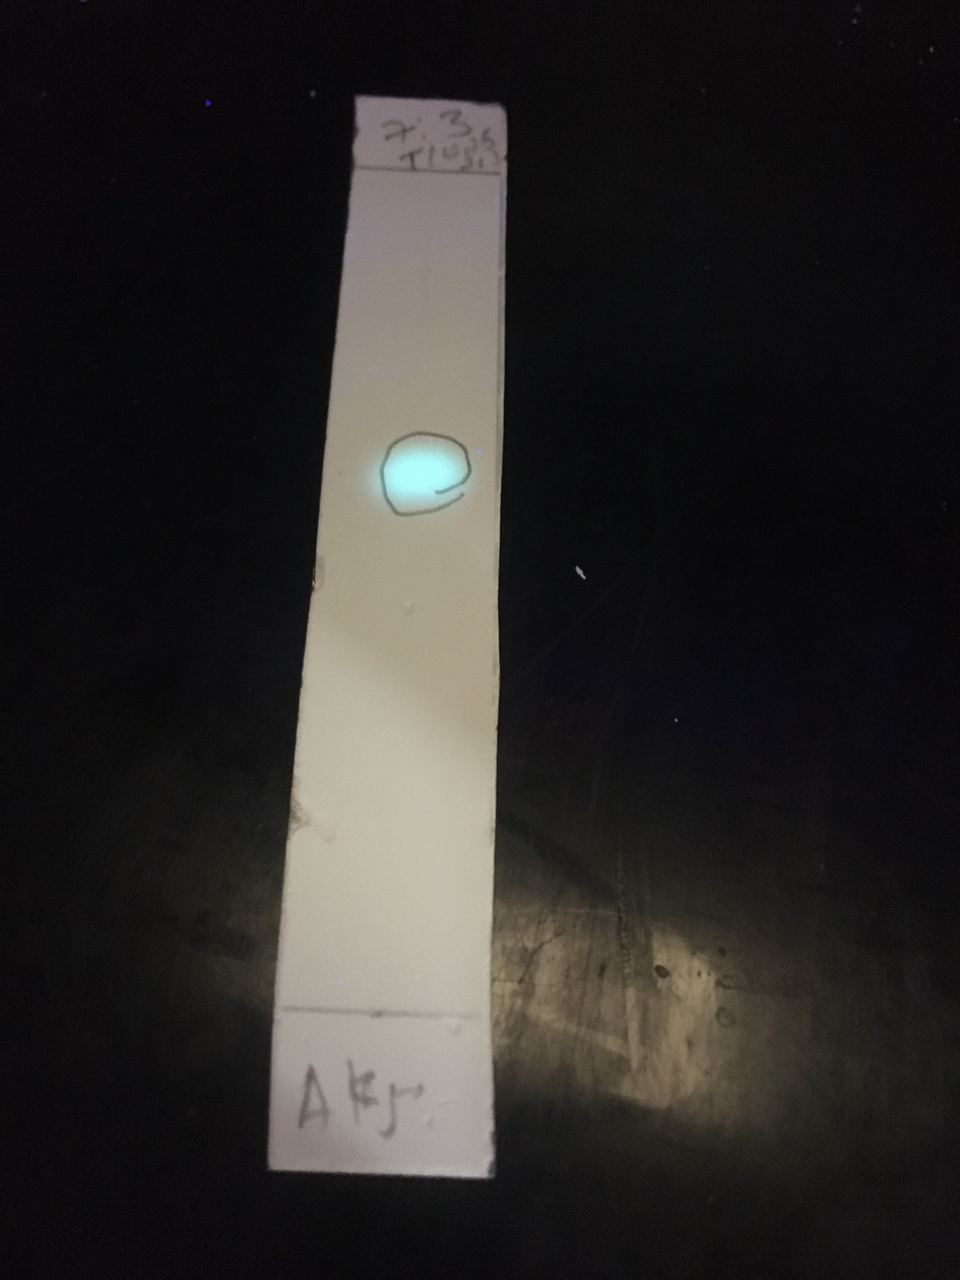


deoxyerythrolaccin(**1**) chrysophanol (**2**) laccaic acid D methyl ester (**3**)


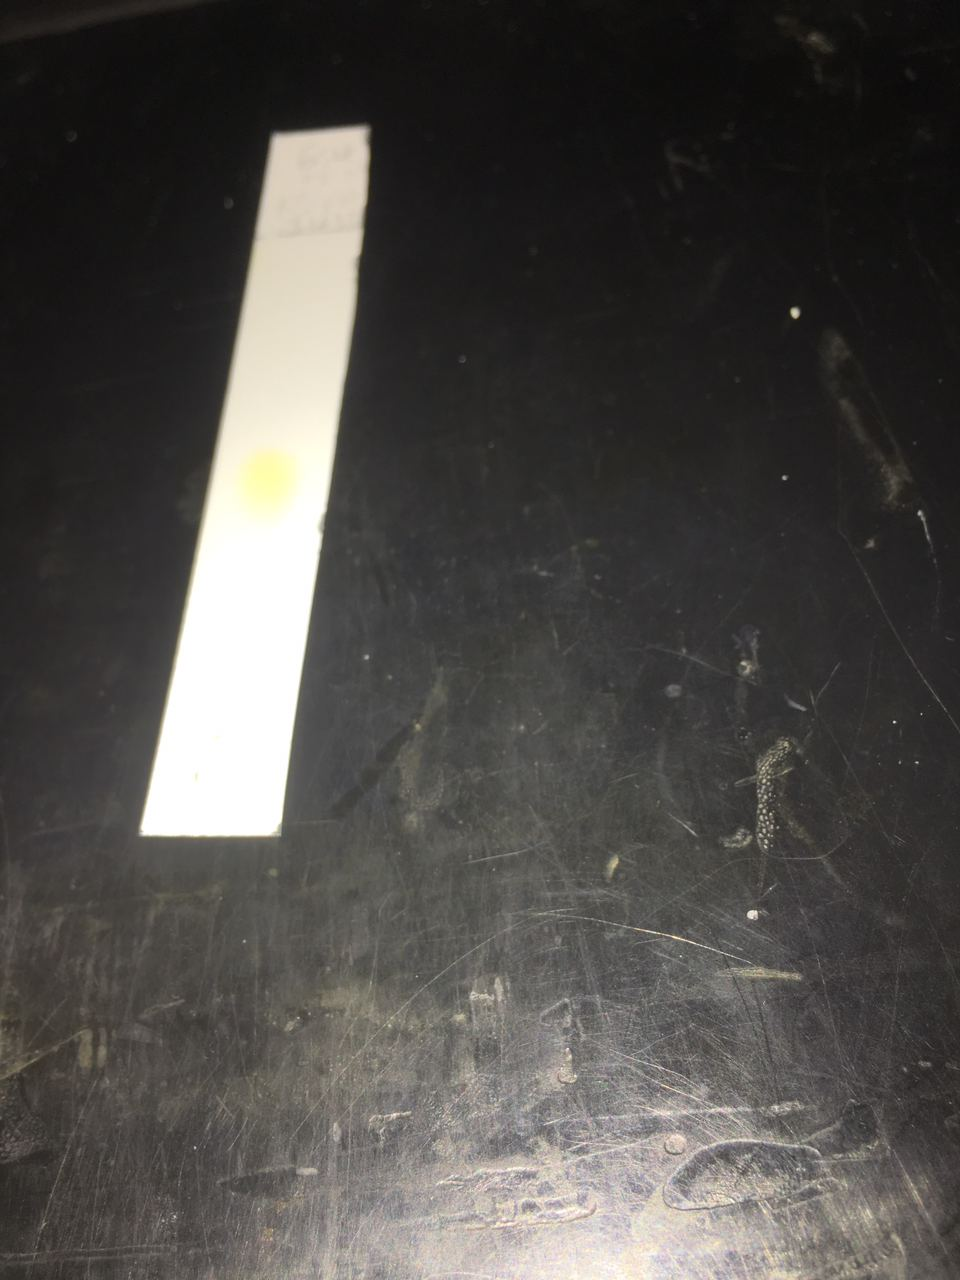

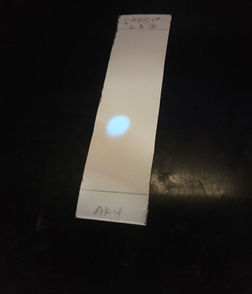


3,8-dihydroxy-1-methylanthraquinone-2-carboxylic acid (**4**) Aloesaponol II (**5**)

4. Antimicrobial Activities of the compounds

Key: AK-3: compound **1**; AK-6: compound **2**, AK-5: compound **3**, AK-D: compound **4**, AK-4: compound **5**


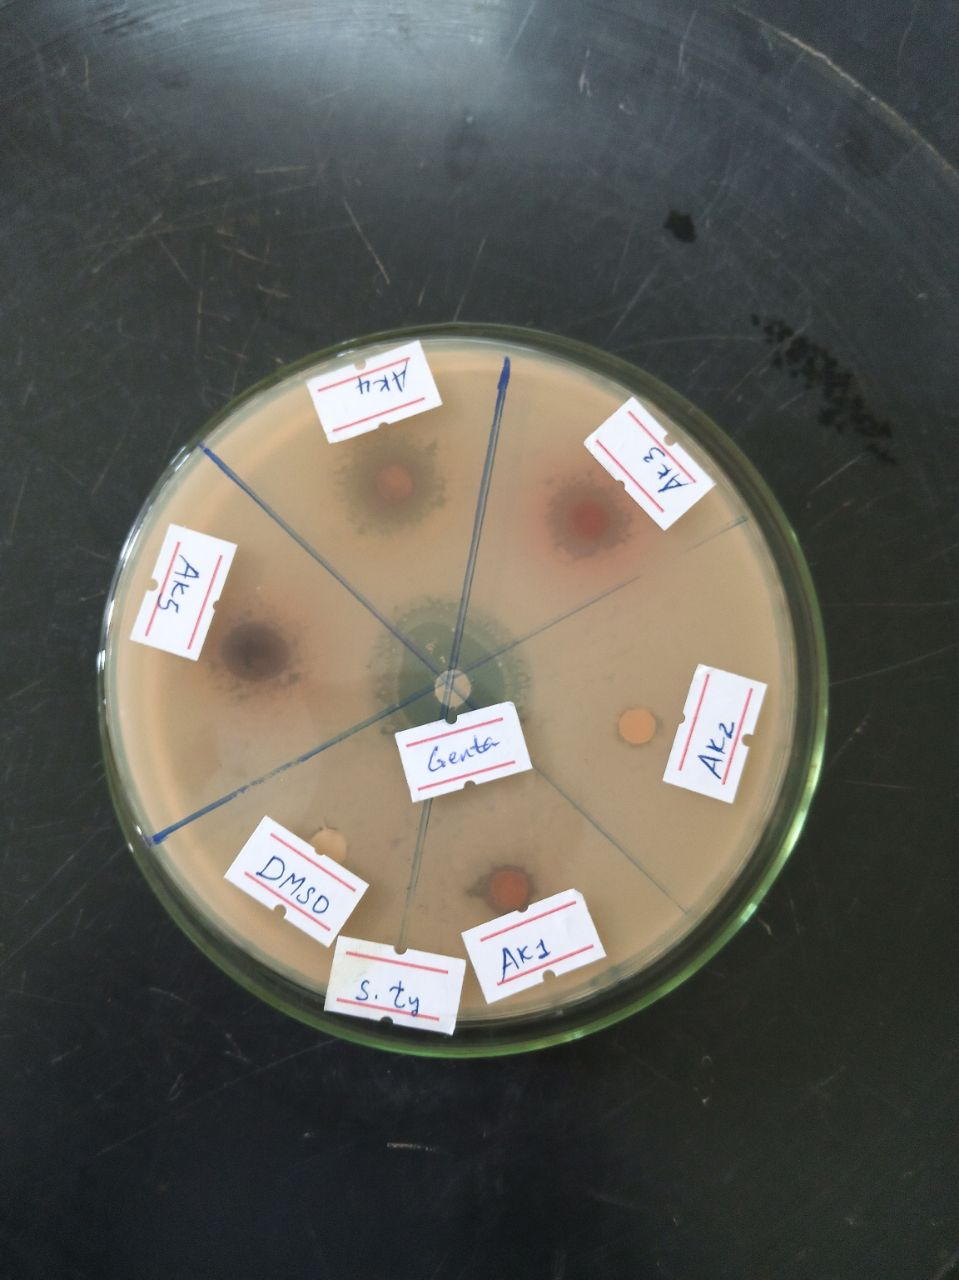

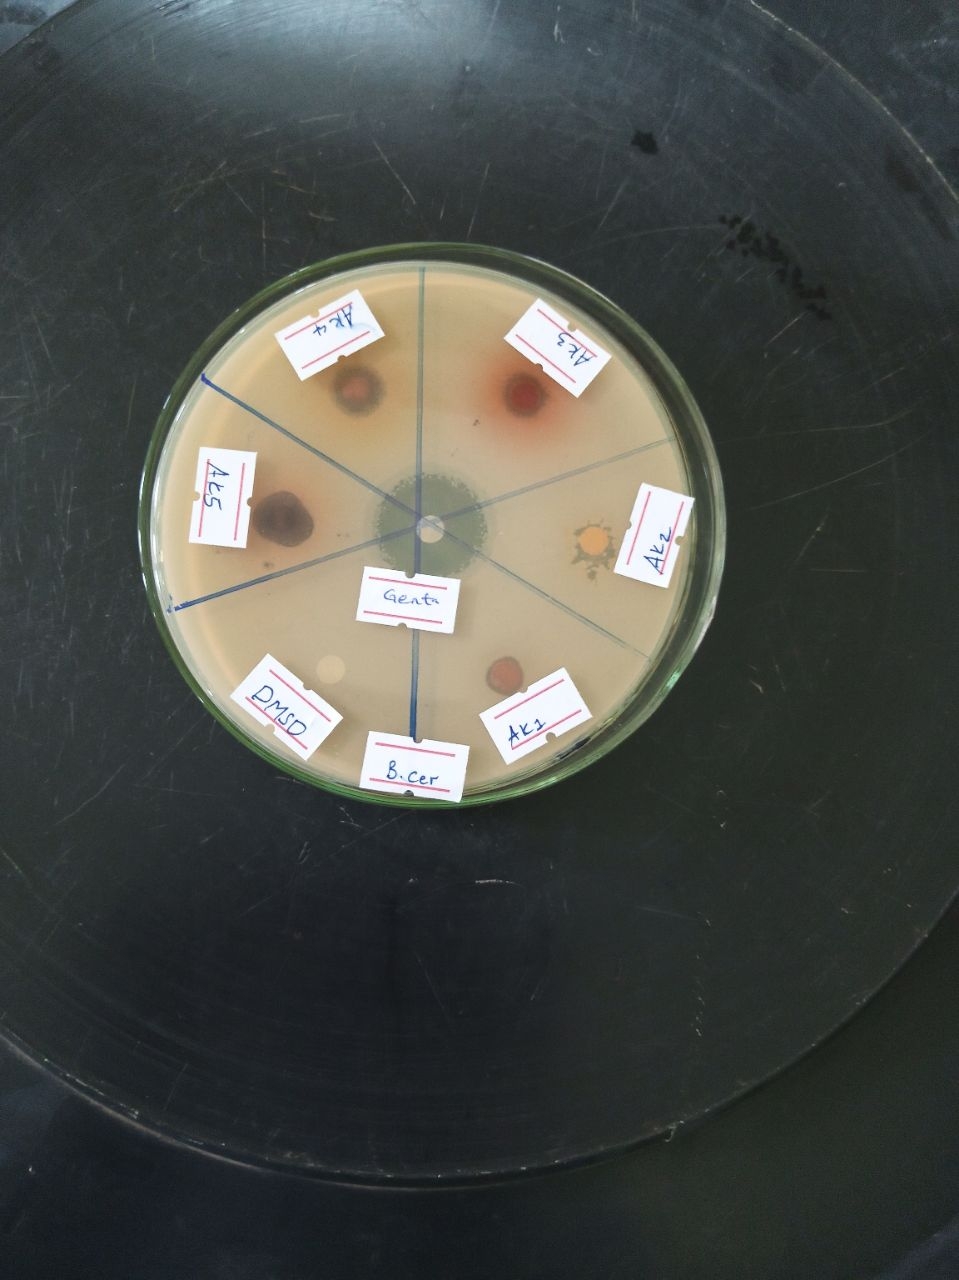

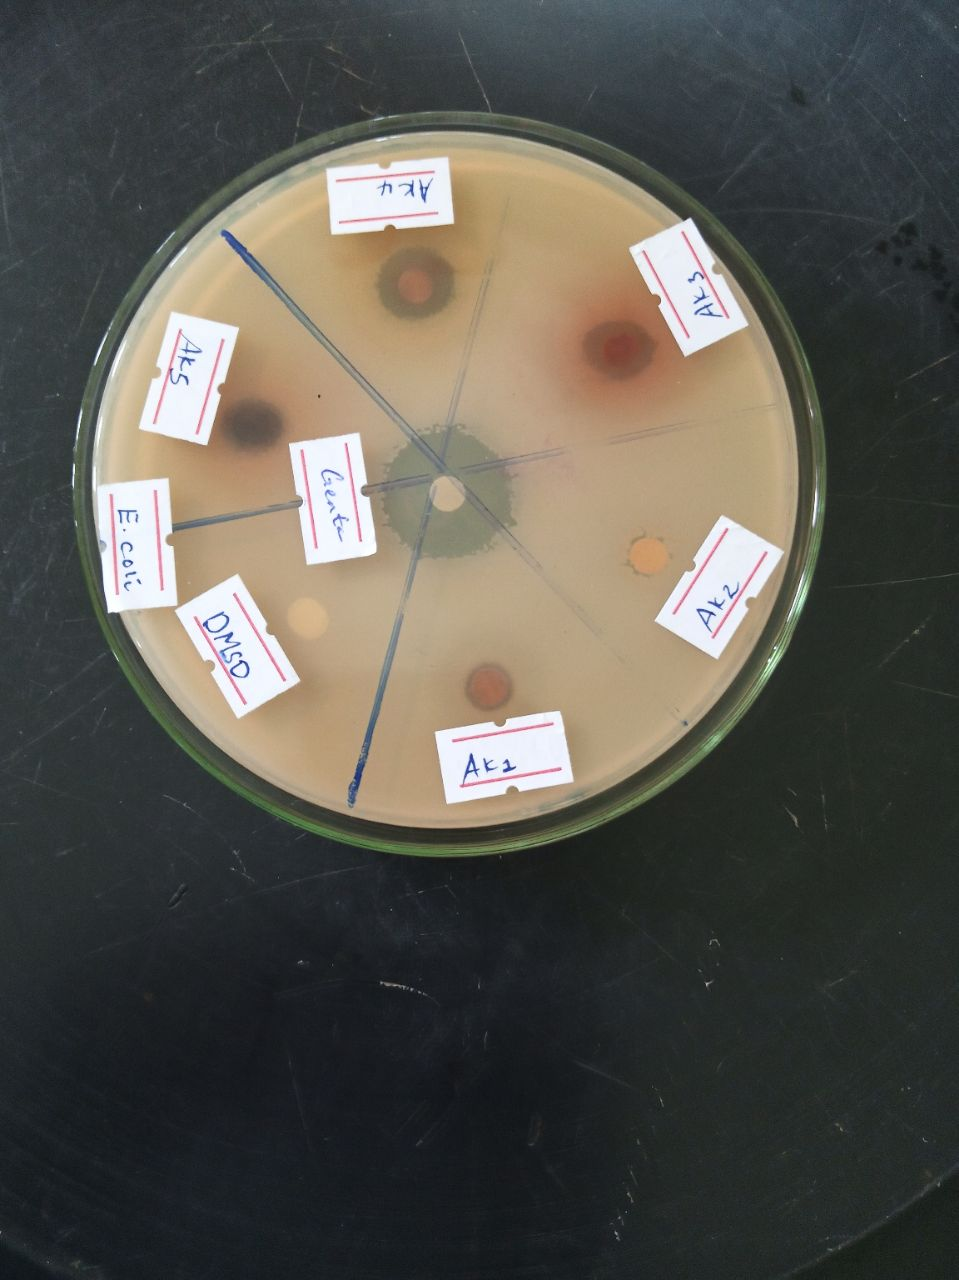

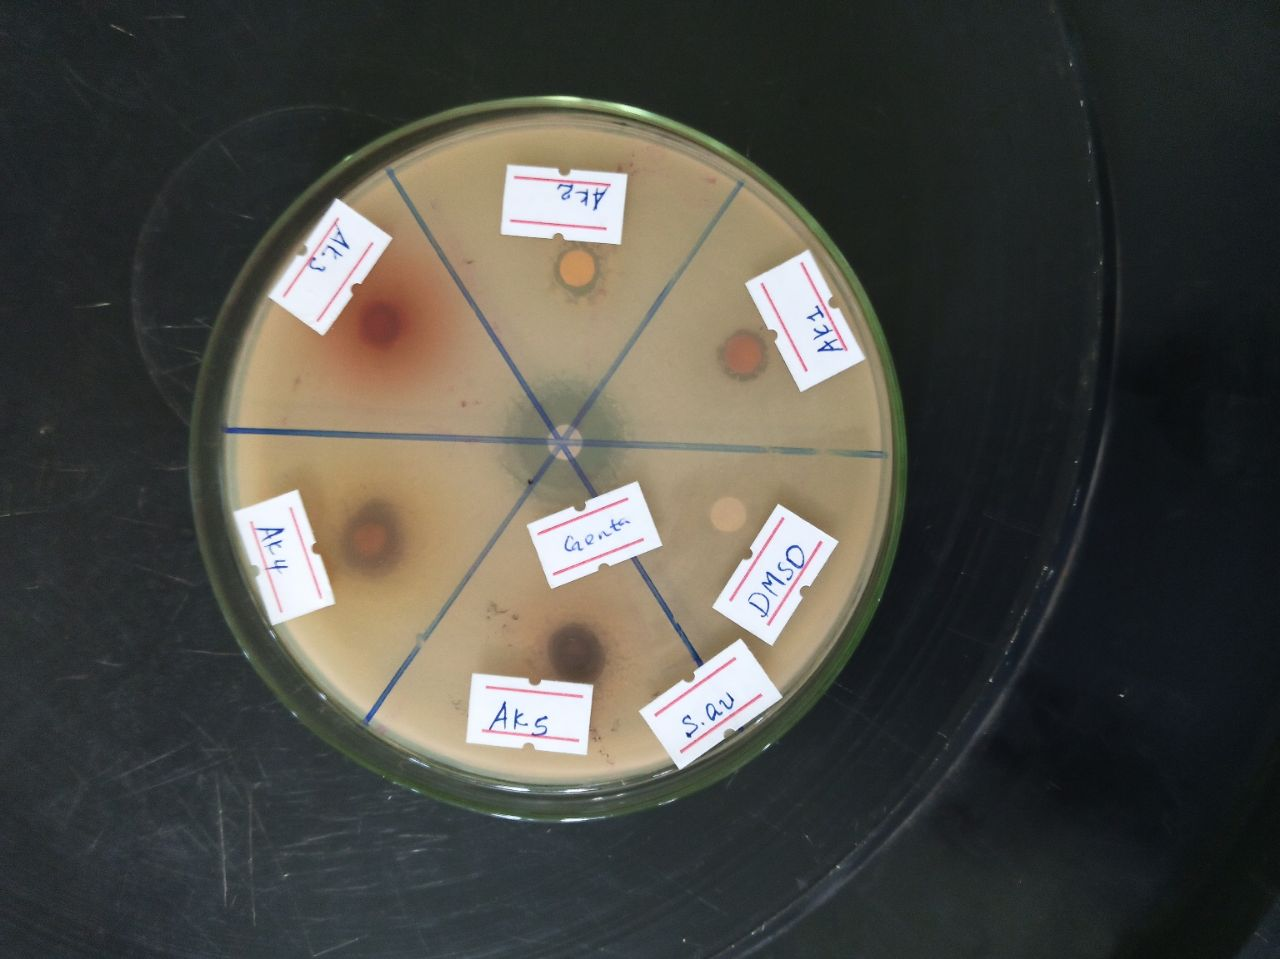

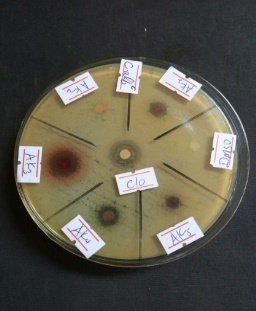


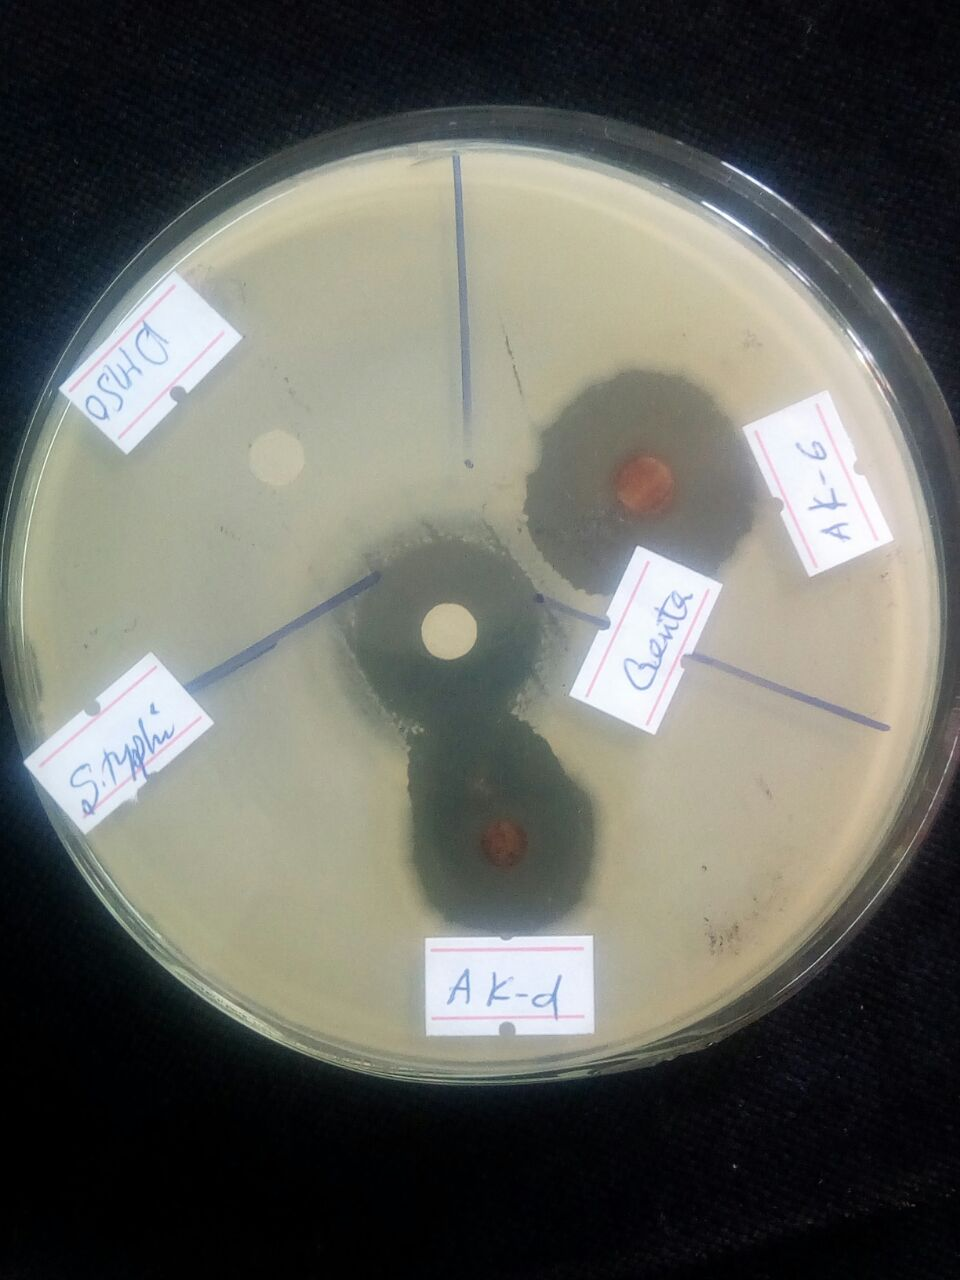

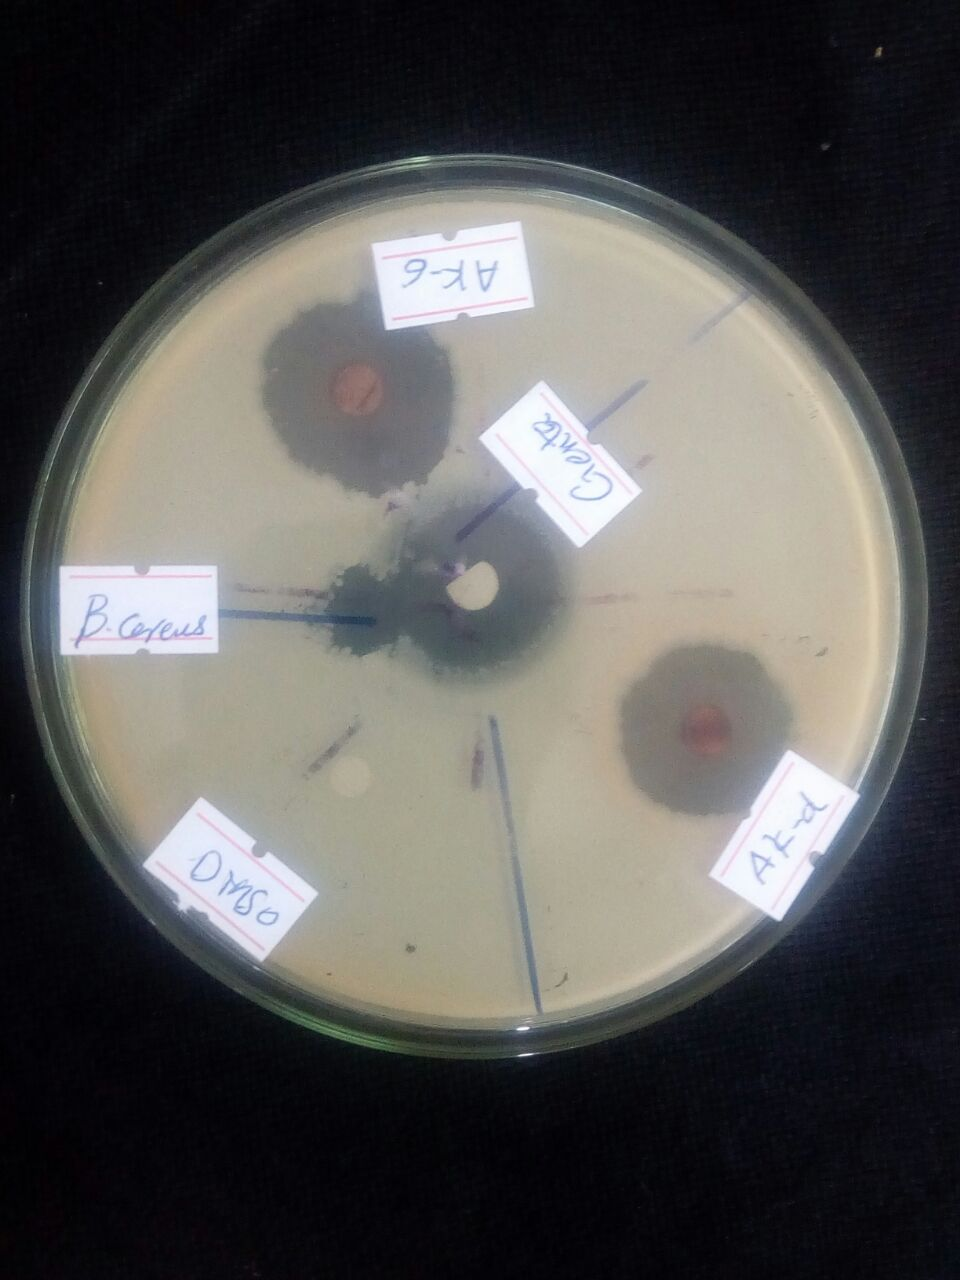

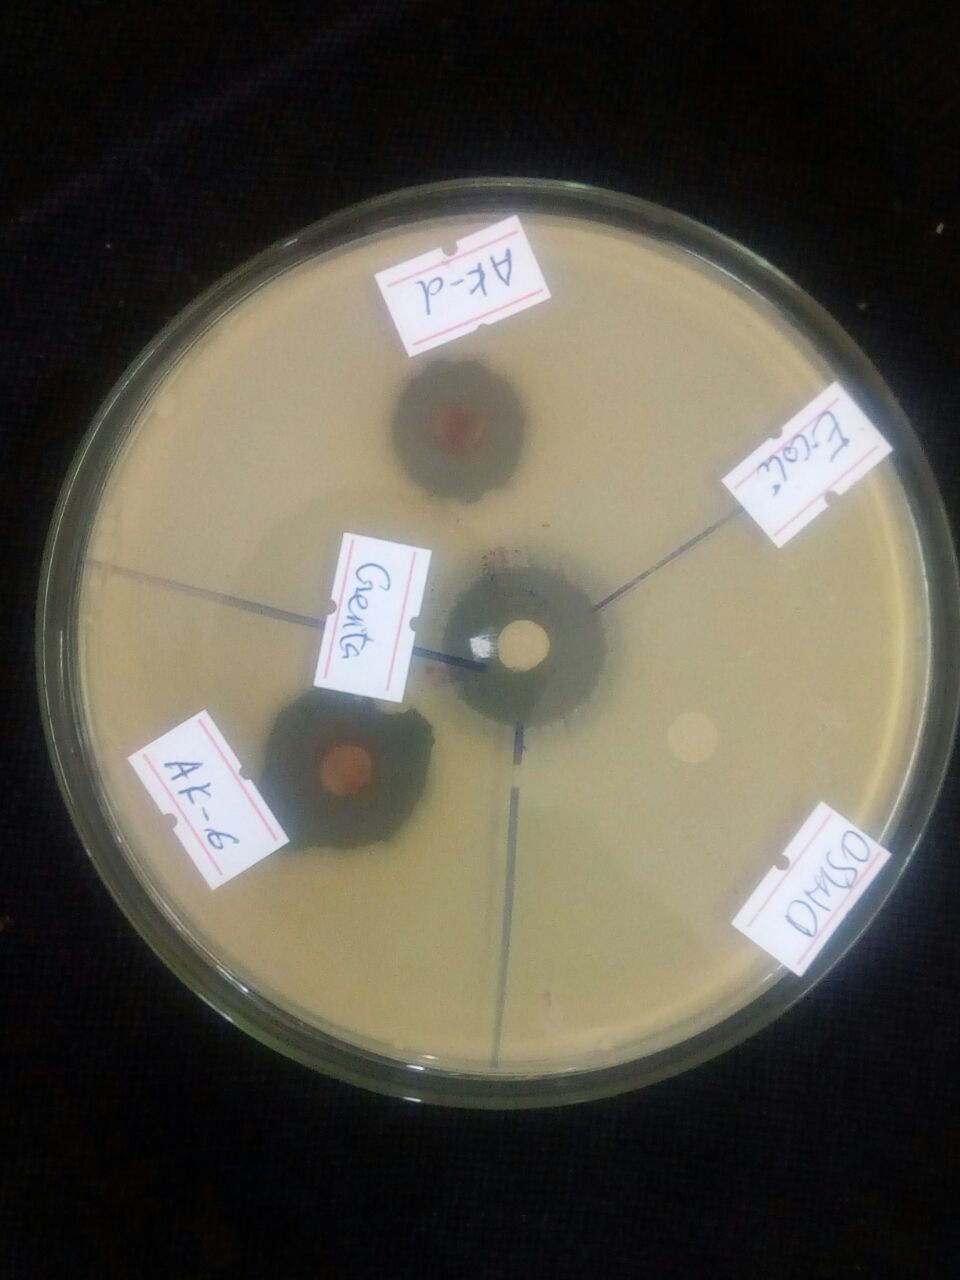

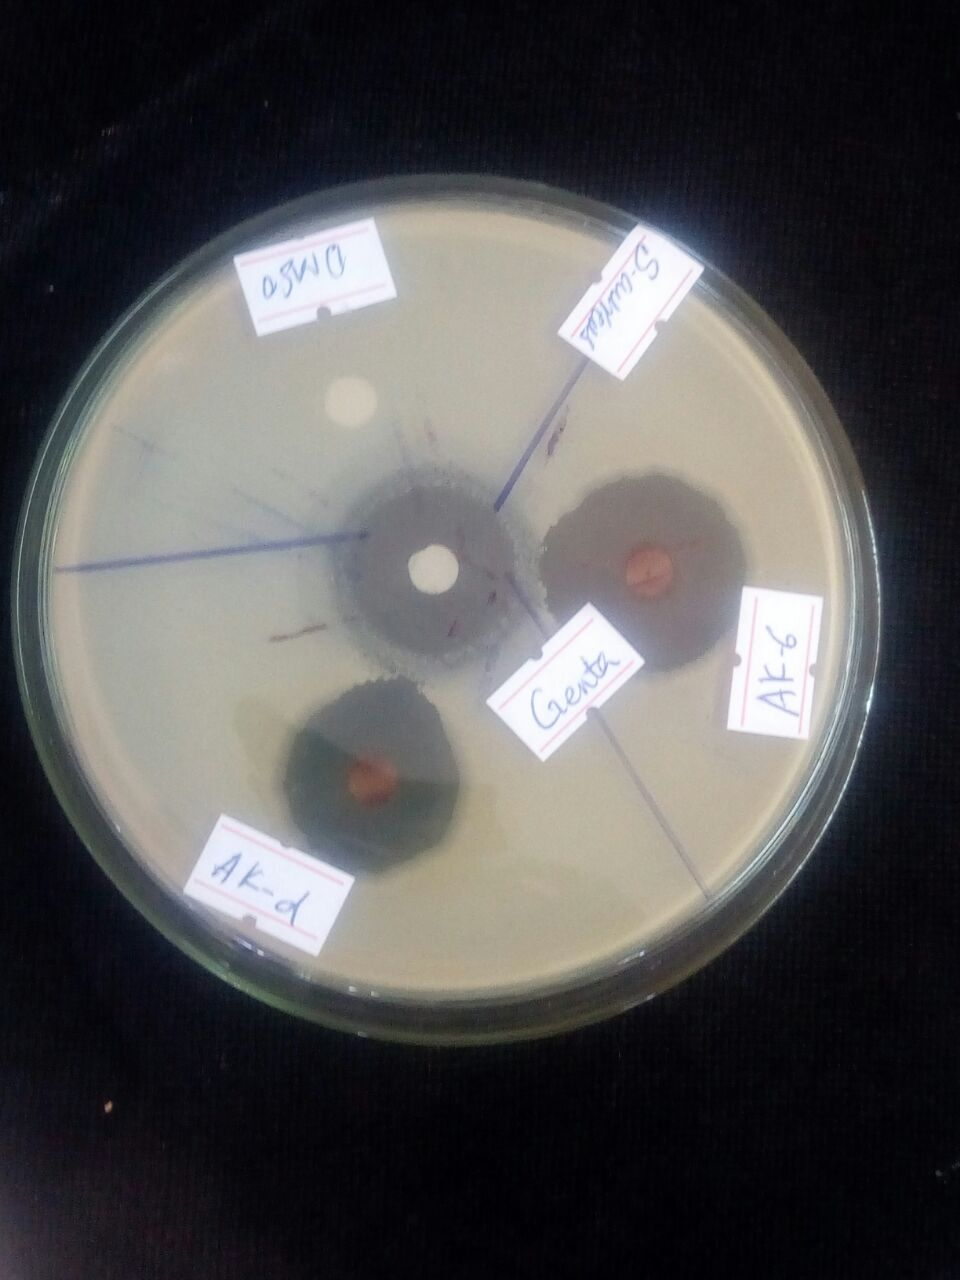

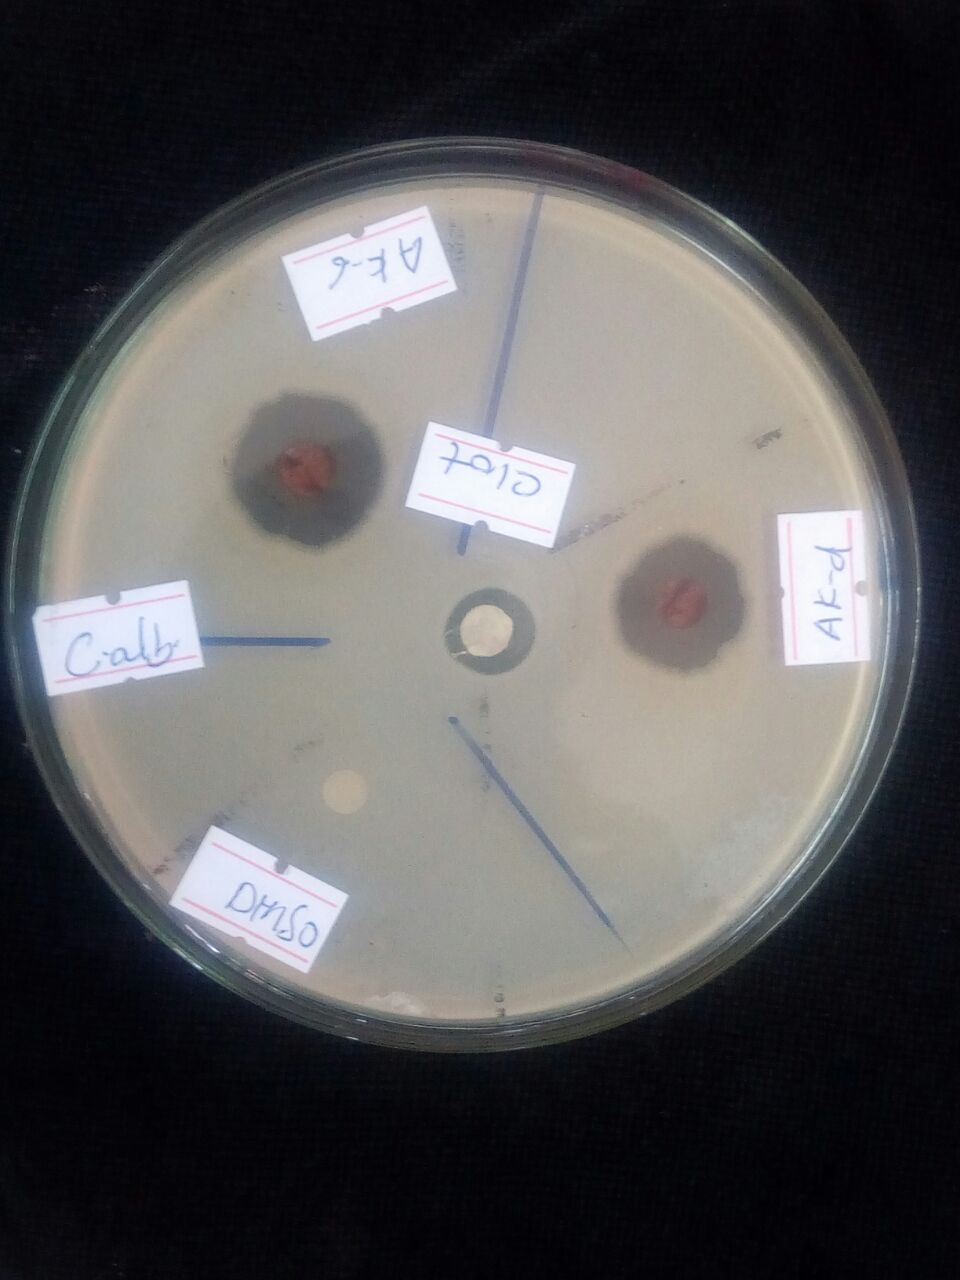


5. Spectroscopic Data

deoxyerythrolaccin (**1**): 1H NMR (in acetone-d6) δ(400 MHz,ppm):2.76 (3H, s Ar-CH3), δH 6.64 (1H, d, J = 2.5 Hz, H-2), 7.09 (1H, d, J = 2.7 Hz, H-7), 7.18 (1H, d, J = 2.5 Hz,H-4), 7.57 (1H, d, J = 2.7 Hz, H-5), 13.3(1H,s, 1-OH (Chelated Hydrogen) ; 13C NMR (acetone-d6) δ (100 MHz, ppm): 24.1 (Ar-CH3), 125.5 (C-7), 113.1(C-5), 109.2(C-2) , 107.9(C-4), 162.7(C-1), 146.3(C-8).

Chrysophanol (**2**) 1H NMR (in CDCl3) δ(500 MHz,ppm): 2.44 (3H, s, Ar-CH3), 7.06(1H, d, J= 2.5, H-2), 7.60(1H, d ,J=2.5, H-4), 7.79(1H, dd, J1=7.2, J2= 2.4, H-5), 7.64(1H,d, J=7.2, H-6), 7.25(1H,dd , J1=7.2, J2=2.4, H-7), 12.07 (1H, s, 1-OH(Chelated Hydrogen), 11.96(1H,s,8-OH (Chelated Hydrogen). 13C NMR (in CDCl3) δ (125 MHz, ppm):22.4 (Ar-CH3), 162.8 (C-1), 113.8 (C-1a), 124.5 (C-2), 149.5 (C-3), 120.0 (C-4), 133.4 (C-4a), 121.5 (C-5), 133.7 (C-5a), 137.0 (C-6), 124.7 (C-7), 162.5 (C-8), 116.0 (C-8a), 192.6 (C-9), 182.0 (C-10).

laccaic acid D methyl ester (**3**): 1H NMR (in acetone-d6) δ(500 MHz,ppm): 2.74(3H, s, CH3-8) 3.96(3H, s,-OCH3-) , 6.69(1H,s,H-2), 7.72(1H, s,H-4), 7.74(1H, s,H-5), 13.17(1H, s,1-OH (Chelated Hydrogen). 13C NMR (acetone-d6) δ (125 MHz, ppm): , 19.4 (Ar-CH3), 51.9 (-OCH3),165.4 (C-1), 111.0 (C-1a), 108.5 (C-2), 164.4 (C-3), 107.0 (C-4), 134.7 (C-4a), 112.2 (C-5), 137.2 (C-5a), 158.2 (C-6), 123.6 (c-7), 141.0 (c-8), 130.0 (C-8a), 188.5 (C-9), 181.3 (C-10),167.2(-COO-).

3,8-dihydroxy-1-methylanthraquinone-2-carboxylic acid (**4**) 1H NMR (in acetone-d6) δ(500 MHz,ppm): 2.79 (3H, s, Ar-CH3), 7.20(1H, s,H-4), 7.59(1H, dd, J1= 7.2, J2= 2.5, H-5), 7.11(1H, d, J=7.5, H-6), 6.66 (1H, dd, J1=7.4,J2= 2.5,H-7 ), 13.3 (1H, s, 8-OH (Chelated Hydrogen). 13C NMR (acetone-d6) δ (125 MHz, ppm): 23.2 (Ar-CH3), 145.5 (C-1), 123.4 (C-1a), 134.9 (C-2), 161.6 (C-3), 107.0 (C-4), 137.4 (C-4a), 112.2 (C-5), 110.8 (C-5a), 124.6 (C-6), 108.3 (C-7), 163.9(C-8), 106.9 (C-8a), 188.8 (C-9),182.3 (C-10), 165.4((-COOH).

Aloesaponol II (**5**):  1H NMR (in acetone-d6) δ(500 MHz,ppm): 2.76 (3H, s, Ar-CH3), 2.73 & 2.94 (2H, m,H-2), 4.31( 1H, m,H-3), 2.85 & 3.19(2H, m, H-4) 6.83 (1H, s,H-5), 6.88(1H, d, J =5, H-7), 6.89(1H, d (J=5, H-10), 15.17(1H, s,9-OH (Chelated Hydrogen); 13C NMR (acetone-d6) δ (125 MHz, ppm): 24.0(Ar-CH3), 203.1(C-1), 110.1(C-1a) , 46.7 (C-2), 65.4 (C-3), 38.2 (C-4), 136.2 (C-4a), 107.6 (C-5), 142.2 (C-5a) , 158.7 (C-6), 119.6 (C-7), 141.3 (C-8), 117.0 (C-8a), 166.4, (C-9), 119.6 (C-10).
